# Supplementary material for: Effects of Sowing Season on Agronomic Traits and Fatty Acid Metabolic Profiling in Three Brassica napus L. Cultivars
Source: MDPI journal article supplement (doi:10.3390/metabo9020037), 2019-02-22
Supplement: s1 [file s1]

**Supplementary Table 1** Meteorological parameters including precipitation (mm), shortwave radiation ( $\text{W.m}^{-2}$ ) in the SAT and WAT sites during the experiments.

| Month     | The SAT site       |       |      |                                              |        |        | The WAT site       |      |      |                                              |        |        |
|-----------|--------------------|-------|------|----------------------------------------------|--------|--------|--------------------|------|------|----------------------------------------------|--------|--------|
|           | Precipitation (mm) |       |      | shortwave radiation<br>( $\text{W.m}^{-2}$ ) |        |        | Precipitation (mm) |      |      | shortwave radiation<br>( $\text{W.m}^{-2}$ ) |        |        |
|           | 2014               | 2015  | 2016 | 2014                                         | 2015   | 2016   | 2014               | 2015 | 2016 | 2014                                         | 2015   | 2016   |
| January   | 0.25               | 1.16  | 0.80 | 151.32                                       | 127.05 | 117.95 | 0.14               | 0.68 | 0.05 | 160.97                                       | 149.94 | 160.96 |
| February  | 0.97               | 0.37  | 0.20 | 146.56                                       | 154.54 | 167.81 | 0.47               | 0.08 | 0.15 | 191.10                                       | 196.25 | 163.60 |
| March     | 1.94               | 0.74  | 1.95 | 179.93                                       | 161.35 | 173.30 | 0.67               | 0.33 | 0.67 | 250.10                                       | 243.71 | 227.04 |
| April     | 2.75               | 3.65  | 4.62 | 195.20                                       | 207.92 | 192.50 | 1.63               | 2.98 | 2.04 | 269.60                                       | 224.36 | 243.84 |
| May       | 5.07               | 8.67  | 5.19 | 198.18                                       | 181.21 | 206.54 | 2.30               | 1.29 | 4.26 | 255.47                                       | 242.44 | 246.31 |
| June      | 5.79               | 12.37 | 6.13 | 171.03                                       | 164.44 | 203.11 | 4.59               | 6.68 | 7.32 | 205.27                                       | 214.83 | 237.35 |
| July      | 12.35              | 2.02  | 3.76 | 211.13                                       | 208.25 | 222.76 | 8.08               | 5.13 | 4.29 | 214.57                                       | 239.88 | 227.62 |
| August    | 4.59               | 4.79  | 4.39 | 206.38                                       | 190.93 | 208.85 | 10.67              | 9.73 | 3.12 | 222.14                                       | 198.53 | 231.86 |
| September | 2.62               | 3.52  | 1.00 | 194.76                                       | 157.39 | 186.17 | 4.44               | 2.79 | 3.89 | 203.11                                       | 159.32 | 163.92 |
| October   | 3.33               | 3.57  | 1.94 | 168.70                                       | 157.46 | 151.57 | 2.54               | 4.83 | 1.00 | 181.65                                       | 182.72 | 173.47 |
| November  | 3.16               | 1.39  | 2.32 | 122.67                                       | 132.64 | 125.26 | 0.98               | 0.09 | 0.49 | 140.29                                       | 171.33 | 158.26 |
| December  | 0.16               | 1.69  | 1.19 | 128.08                                       | 116.46 | 122.00 | 0.07               | 0.48 | 0.48 | 129.85                                       | 132.12 | 140.94 |
| Annual    | 3.58               | 3.66  | 2.79 | 172.83                                       | 163.30 | 173.15 | 3.05               | 2.92 | 2.31 | 202.01                                       | 196.29 | 197.93 |
